# Supplementary material for: NHERF1, a novel GPER associated protein, increases stability and activation of GPER in ER-positive breast cancer
Source: PubMed Central journal article supplement (PMC5342396; doi:10.18632/oncotarget.10713), 2016-07-19
Supplement: oncotarget-07-54983-s001.pdf [file oncotarget-07-54983-s001.pdf]

## NHERF1, a novel GPER associated protein, increases stability and activation of GPER in ER-positive breast cancer

### Supplementary Materials

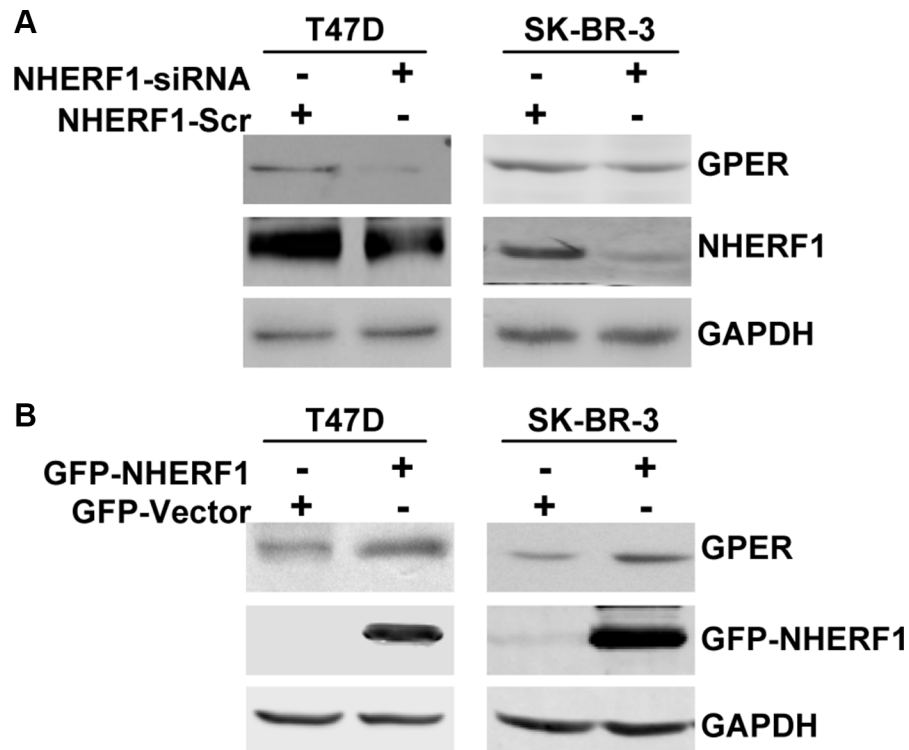

#### Supplementary Figure S1: NHERF1 expression enhances the protein levels of GPER in T47D and SK-BR-3 cells.

(A) Knock down of NHERF1 expression decreases GPER protein level. T47D and SK-BR-3 breast cancer cells were transiently transfected with NHERF1-siRNA or scrambled sequence (Scr) for 24 hours. The endogenous GPER protein was then detected by Western blotting using anti-GPER antibody. (B) Overexpression of NHERF1 increases GPER protein level. T47D and SK-BR-3 cells were transiently transfected with GFP-Vector or GFP-NHERF1 for 24 hours. The endogenous protein of GPER was then analyzed by Western blotting using anti-GPER antibody.

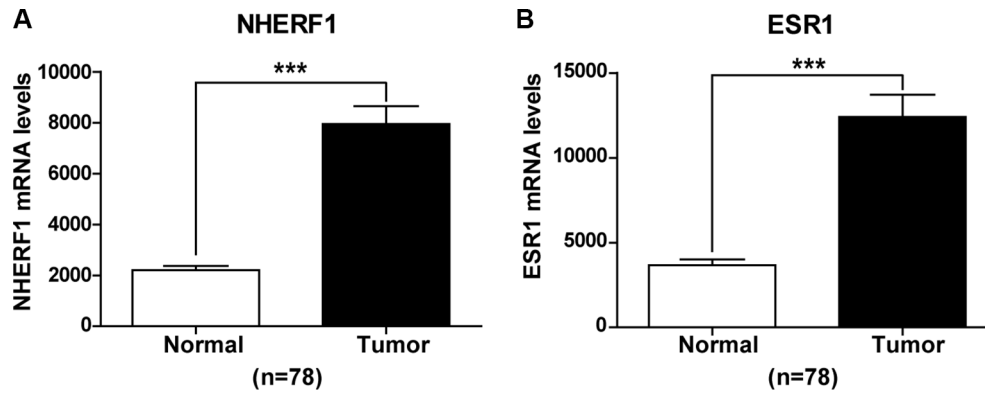

**Supplementary Figure S2: NHERF1 and ESR1 mRNA levels are up-regulated in ER-positive invasive breast cancer specimens.** NHERF1 (A) and ESR1 (B) mRNA levels in ER-positive breast cancer specimens and paired normal breast tissues ( $n = 78$ ) were analyzed based on the data set from TCGA. The levels of NHERF1 mRNA in normal breast and breast cancer were  $2205 \pm 165.2$  and  $7944 \pm 702.5$ , respectively. The levels of ESR1 mRNA in normal breast and breast cancer were  $3670 \pm 340.4$  and  $12400 \pm 1312$ , respectively. The difference between the ER-positive breast cancer group and the paired non-tumor breast group was statistically significant ( $***p < 0.001$ ).
